# Supplementary material
Source: publisher figshare collection journal article supplement (https://rs.figshare.com/ndownloader/files/16783652)
Supplement: Supplementary file 1 [file 16783652]

## Sheet: 2.1 Footprint specific proteins
Table S2.1: Expression pattern, DNA and protein sequences and primers of A. rubens footprint proteins.
*accession numbers refer to shorter sequences derived from the transcriptome, the corresponding sequences in this list were elongated with RACE PCR.
Transcript name	NCBI accession	transcript ID (trinity)	in situ pattern tube feet whole mount	Figure	DNA sequence	translated protein sequence	in situ FW primer name	in situ FW primer seq	in situ RV primer name	in situ RV primer seq	length in situ probe
Sfp1	AHN92641.1	comp43_c4_seq1	adhesive epidermis+ISH sections	Fig. 3a,b	TCACAAAAAAGCTGGGAACATTGAGATAAACTGCCTCAGCAAAGTAACTAACTACATTTTAGTGTCACAGACTTCAGGAGTGGACTTGGGAGTGCCACGTCGGGTTCTCTTCACACTGGCAGCTCACATCGTCGACTATAGATATTCCGGGGACGACCAAGACGACACAATCAGCACACCGGGGTGGCAAGAGGTTTACCCAACGACACGGAGAAACGAACTCTCCAGTGGACCAAACATGAAAGCGGCACTGCTTGTCGTTTTGTTGGTCGCCTGTTCGGCAAATCTAGTCACCAGTCATGACGCTACTCCGGCTTCATGTCAGGATGTACTAGCTCAAGGAAACACACACGATGGAATGTACGAAATCGACCCTGATGGTGCAGGAGGCGAACCACA…	MKAALLVVLLVACSANLVTSHDATPASCQDVLAQGNTHDGMYEIDPDGAGGEPQFQVYCELAGGKGVSIIHHDAECADREACKVDGFEEPGSFVKKVNYKGNIKQIEALIDLSGYCEQFLSYEAHASVIFWQPQNKNYAWWQNRNNRVMQNWGGAPTGTHGCGCSTEAEGCIEKKRCNADCNTHQLTIDSGYLNDKDNLPVTELHFGDTGTLTDNEYGFYKLGPIRCSGGPTHKEQEIPVFNTDTIYQYRYDLPRIKPGECRIVFEVQACNDAFIGFSEQEGEQAELIELNIGGWGNSKTVIRNCKQCQTESAIEESILSCDEPKKFFVSWCTGTFTFGREGHGSLLSWNPPRSIHPTHVAFSTGYGATGTFSFDSFFSKEIHTCQNQKADINCGSRFV…	Comp43_FW_3	CTGTCACTAACATGGGACTTCAGG	Comp43_RV_3	GGATCCTAATACGACTCACTATAGGGAAGTACAACCCCTTCACGTAACC	599
Arub-1	GHKZ01075379*	comp199_c0_seq5 elongated with RACE PCR	adhesive epidermis	Suppl. Fig. 4a	ATAGTAAAACCACGTTACTTGGGCTCTTATTCTACACTTGCTTGAGCGGAGCGCCAGGCAGCAGTAGTACAACGGGCATTTTTGAGAGACCACAGGAGTCTTGAAACTTCTGAAGGAGCCAAAATGGGGCGATTCTGCTTTGATATCGCCTTCTGCAGTCTGGTATGTTTGTTCCTCGCTATCTACAGCGTCGACGGTTACTCTATTTCTAGAGGAGGTTCTGGGTCTCAGGAAAGTACAAAAGGAAGCGGGGGTTCTTCAACAGGAGGCTCTCATGAACAACACGCACCAAGTCCTCAGCCTTGTGATAGTCATCCATGCCAACATGGCGGTATATGCCATAATCATGGAACAACATATGAGTGTGTTTGCCCCAGTGGCTGCTCAGGAGCACGCTGT…	MGRFCFDIAFCSLVCLFLAIYSVDGYSISRGGSGSQESTKGSGGSSTGGSHEQHAPSPQPCDSHPCQHGGICHNHGTTYECVCPSGCSGARCELENKLLDTIKGATGSGPSSSSSQTYPDHVNSKSNSGSNEVPALGDTQNPTKSASKESRPSSSGSSSHTDPDHVNSKPSSESNEVPAPNPQPCDSHPCQHGGVCQNKGQLFECVCPSGCSGRRCENGPVQDPCANNPCEHGGACSPYGSSYRCSCPSAYMGSRCQLGKTQNPTKSASKESGHSSHGSSSHKDPDHVNPKSNSGSNEVPALGDTQNPTKSASKENRPSSPGSSSHTDPDHVNS	199_ISH_Fa	CAGCAGTCAAACTTACCCTGACC	199_ISH_Ra	GGATCCTAATACGACTCACTATAGGAACATTTTTGCCTTTAAGTTTCAGC	744
Arub-2	GHKZ01074524*	comp1698_c0_seq2 elongated with RACE PCR	adhesive epidermis	Suppl. Fig. 4b	GGAAAGCCAAACGTTGTCTGTGTTCCCTCTTCTAACAGTGAATTCCCCCTTGGTACTTCCACGGTGAAGTGTACAGCTACTGACGAATCCGGAAACGAAGCGACATGCGACTTGGTAGTCGAGGTGAAAAATTCCTGTGAAAACAATCCTTGTGGACTACACGGAACTTGCGTGGTTGATGTGTTTCAACCTTCAGAATTCAACTGTGTGTGCATCGATGATTACGAAGGGGAATTATGCACAAAGGCACCAAAGGTTGATGAGGAACCGTTGGTCGAGGAATCAGATGTCAAATCATCCACCAAAGCTCCTGGACGGAGCTCAACTACTCCTAAGCCCCCTAAGCCAGATGTTGATGAAGGGGAGACTTTTACAACTTCAGGAGATTCTTCACAGGAG…	GKPNVVCVPSSNSEFPLGTSTVKCTATDESGNEATCDLVVEVKNSCENNPCGLHGTCVVDVFQPSEFNCVCIDDYEGELCTKAPKVDEEPLVEESDVKSSTKAPGRSSTTPKPPKPDVDEGETFTTSGDSSQEIKRTLDTKVISAFEISPFDDKVSKEFQIGCEIGEFKLDVNSETFSLKNGKGEVVDSETTPETSGSLKFSIEITESAFIISYILDQDFTTLIEYSPPGREDGKELDCKAFTVKNVDKRRQRGCQIKYTKISQTRWRSYNRRNRPSNTRKVQTGATYVPKKTSGSKPRRVREHSRGSGSGSGNSKGSKSGGGRRGRGSGSGSGKKDKILSAGETFVPKKTSGSRPRPTVRERSSGSGSGSGNSKGSKSGGGRHGRGSGSGSGKKKK	1698_ISH_Fa	CATTTAGGTGACACTATAGAAGTTGGTAGTCGAGGTGAAAAATTCC	1698_ISH_Ra	GGATCCTAATACGACTCACTATAGGGGATCTAAACCACGAAGAGTGAGG	795
Arub-3	GHKZ01068220*	comp6449_c0_seq1 elongated with RACE PCR	adhesive epidermis	Suppl. Fig. 4c	ATTTTGACATCGGGAGTCGCCGGTGATCACATGCCAGCAGAATTTTCAATTTCAAAATCATCAAGTCGGTTTTCAGGTAAAGAAGACCTGGGATTTTGAGTGAAGGTGATTCCGCTCCAAGATGGCTAAAATCACACTACTTGTGGTTCTTCTAGTGAGTGTTCTCCCTGCGATTGCAAGGAAAGATCAAAGTTACAAGTGCAACTTTCTGGAGTCCAATGGCGACGGGGCATACGTCTTTGATGATAAGCAACTGAACGGGGGAAAGTTTTCAGTCTCCTTCAATGTAATTGCGAACAGAGATGTTCGTATTGCGCTATCGCCTATTAAAGAGGAACACAACAGCATGATTGTCATATCTATTGGTGGACCCAATAACGACGACTCCACCATAGGAAA…	MAKITLLVVLLVSVLPAIARKDQSYKCNFLESNGDGAYVFDDKQLNGGKFSVSFNVIANRDVRIALSPIKEEHNSMIVISIGGPNNDDSTIGKSDGTILSEYLMTTGSRESELQCLTTCMNNYWICYEDNMLNVGRGGEIEPFLKYSVDAASSFDPGYVGFSTGSGVGMFGNIQAYESCADRQENPTMTSTLQPRSCATIDCGDVTCEWGFKKNAEGCMTCECKTSPCSGLTCSETCANGYEVDDHGCFTCDCKSGPCDSQPCQNDGYCVSEDADEYRCICVNGFTGTNCERDEVPPTIECPANMEFNTDQGSAFATVTYELPEASDNDGEPSIECIPDFLTLGIGANTIKCKAVDAAGNEASCEYTITVKDEEPPQMTCPVDMDVPTDEGLPTSSFDF…	6449_ISH_Fa	TTTACGTGTGACTGCAAAAGTGG	6449_ISH_R	GGATCCTAATACGACTCACTATAGGGCTTTGCATTTGATTGTATTT	317
Arub-4	GHKZ01069933*	comp73892_c0_seq1 elongated with RACE PCR	adhesive epidermis	Suppl. Fig. 4d	AAAGCGTGACATAGATACGCTTGTCAAGTCCCAATTGAATGTCAATCCCAAGATCGGCTATTGTCATACGAGAGAATATCGAGGACACCTGACGAGCAATGAGGGTTGATCCAGCAAACAGCTTTTGTGAATACCTTCTTGTCCAGATTCCTGAAGATGATACACAGGGAGAGATTAGAATCCTGGCGCAATTCGATGACTGTTCAGCGAGTCTGCAATCGTGTTTGATTCTCGTGAGCGTGGTCACGCCCGACCACATGTTTGAACTAAATGCACAGGGATCAATAAAGGTGTCAACAGGTGATATTTCACAGTCTCAAAAGTTACCGTTTGAGATGAAGCTGAAGGATGGATCAACCCTCATTGCTCGTCAGGTGTCCTCGATATTCTCTCGTATGA…	MRVDPANSFCEYLLVQIPEDDTQGEIRILAQFDDCSASLQSCLILVSVVTPDHMFELNAQGSIKVSTGDISQSQKLPFEMKLKDGSTLIARQVSSIFSRMTIADLGIDIQLGLDKRIYVTLNPSLQGKVSGLCGNYNNKQIDDFTTSSGVNAKANINNFGNSWKVSLHCGDVEEKNLRPCDLKSQQRPLAEEICRKLREEPFASCNQEIPVDKYVEQCEQDVCGCPPSDKECQCLAFATYARECSVAGFDFLWRGLHNCPIKCPVGQVYKMCGSNCHVNCKDFLTQQPCHEECVEGCQCPEDKVSRRLLKEHVALNRSSWSIKSVCSRFANAFM-	73892_ISH_Fa	CGTATGACAATAGCCGATCTTGG	73892_ISH_R	GGATCCTAATACGACTCACTATAGGGTCAAGAAATCTTTGCAATTCACG	560
Arub-5	GHKZ01076463	comp33_c8_seq14	adhesive epidermis	Suppl. Fig. 4e	AGATTGTGAATACCAAACGGTTGTCCCGGACTTTTCCTTGTAGCGATTCTGAGTTCAGTTCTTTACCACTCTCATCTTTGATGCTCATTTTTGTTCTGATTACATCTATTCTCAATACTTTGCCATCTTGAAACGTCAAGTCGAGGAAATCCTCGACTCTATCCTCAAAGTTGACTTCAAACTTTTTCAGAGTCCAATCTACCTGTTCTGTATCTCCTGAGACCAATGTAGCCGATGAACTTGCAGCTGGTGCTCGTCTTCTAGTAGTTACACCTGTGTTCTTGTTTACTGTTGCTCCAACTGATATGGCTTTC	KAISVGATVNKNTGVTTRRRAPAASSSATLVSGDTEQVDWTLKKFEVNFEDRVEDFLDLTFQDGKVLRIDVIRTKMSIKDESGKELNSESLQGKVRDNRLVFTI	FW_33_T7_seq14	GGATCCTAATACGACTCACTATAGGTCCCGGACTTTTCCTTGTAG	RV_33_seq14	CATCGGCTACATTGGTCTCA	214
Arub-6	GHKZ01073885	comp17_c0_seq1	adhesive epidermis+ISH sections	Suppl. Fig. 4f,g	CTCCTCAAGGGCGAACTGGAGTACATAAAGCAATGGTGAGCAGAACATGGTCATTAGTTGCACATTCCTGCACTGACAGAGAAAGTCGTTGCAGTCAACATGGCGCGTCTCTGGTTGGCTGCTGCTTTGTGTGCTTTAGTATTCATTGCTCTAGCTAACGATGCCGAAGGACATGGACATCATTATGGGCATCGCCATGGATATCACCATCATAAAAGCAAAGGCGCATGCAAAAGCAAAGGACGAAATATAGGACACCATCATGCTCGCAAGAGCTACCCACGTGGAAACATAGGAGTTTTGGGAAGTCTATATGCCAAAAAAGGATGCTCAAAGAGAAGACATAAGAGTCATAGTGGTCATAAACACGGACATGGTCTTTTCAAGGCTTTTGGTGAC…	MARLWLAAALCALVFIALANDAEGHGHHYGHRHGYHHHKSKGACKSKGRNIGHHHARKSYPRGNIGVLGSLYAKKGCSKRRHKSHSGHKHGHGLFKAFGDIKKCGSRRRKHGLSVSGNKKSHSHSHSGGRSHKLNINNKRRNRSRKRQKHGGSGSKDSSGSSSHHVNKNNKRRNRTRRQKKRGSSSSSSSSSGGNSDHQQTNTVDKKRPVPSKKEHPCRSNPCQNGAECYEKPNGDYTCSCKAGFRGTRCEQKIVVKVRPCDSNPCLNHGQCIPSGSGYRCRCERGFAGENCQIVPKSFDPCAGVVCHNGGTCYAENGEAKCKCRTGFKGTLCRNKVDRSGACANNPCKHNGDCHEIDNGNTFYCNCMGDWEGVTCKIAIDHSGPCDNNPCAHGHCVPS…	FW_17	ATCATCATACACATCGGCAAGG	RV_17_T7	GGATCCTAATACGACTCACTATAGGCCAAACTCCAATACGTTGTTCG	842
Arub-7	GHKZ01092496	comp9623_c0_seq4	adhesive epidermis	Suppl. Fig. 4h	GAGTTACCAATTGAACAGTCTGTTGGCAACAGTGCTGTTCTGGAGAGAAAGTTCAATAGCAATATCAATGTTCGTGGAGTTCTAATCACTTTGAAGAAAATCACATCAAGTGTTACTTCTGGACAAGCAGAAGGAATGACCACACCAGAGACAGGATCAACGTCACCGCAGTCAGTCAAATTCACTTTCACATTACTTGCAAAGAGAGTAGACGAGACAGATTTCAAGCAAGTGGTGATCAAAAATACAATCACGGAGTTTACCTTGACTATTGAGGGTATTCAATCGGAAGTGAAGGTATTT	ELPIEQSVGNSAVLERKFNSNINVRGVLITLKKITSSVTSGQAEGMTTPETGSTSPQSVKFTFTLLAKRVDETDFKQVVIKNTITEFTLTIEGIQSEVKVF	FW_9623_seq4	TGGCAACAGTGCTGTTCTGG	RV_9623_seq4__T7	GGATCCTAATACGACTCACTATAGGCTTCACTTCCGATTGAATACCC	274
Arub-8	GHKZ01070994	comp133_c0_seq4	adhesive epidermis	Suppl. Fig. 4i	TGGGTCCACACTCCTCAACACAGATTCCGAAAACACCTTCAGGGGCTTTGGGACACACGGCAGGAGGGCCTCTGCAGCTACATGTTTCACATCCATTCTCATCAGTAACACGGCCATAGAGACATCCGGTAAGCCCACAGATAAGAGGTGGACAGGCTGCTTTACATACATGACCACACCCATTAGAGCAACACAGCTGACCATCATCACACTTCTTAT	IRSVMMVSCVALMGVVMYVKQPVHLLSVGLPDVSMAVLLMRMDVKHVAAEALLPCVPKPLKVFSESVLRSVDP	FW_133_T7	GGATCCTAATACGACTCACTATAGGTGATGAGCCTGCACTGAGTC	RV_133	AGCAGCCTGTCCACCTCTTA	842
Arub-9	GHKZ01076249	comp1476_c0_seq3	adhesive epidermis	Suppl. Fig. 4j	CTTGAAGCCCTCAATAGAGCAATCCTTGATCTCGTTGTTGTATTTATCATGGAATATCTCAGGAAGACCACACTTTATGCTGCAGTAAGTGGAATGACAAATAGCGTCTGGATATGCTTTACAATGTTGCCCATATGCACAAGGAGGTGAAACACAAGTTATGGTATCTGGTAGTGGTGGACAGCTGATCAAATCCGAAAAATCCTTGTTGCATTCCTCAATGGCTGTGCCACTATCATCAAAGAACTTGGTAAAGCATCCTCCACAACGACTGATGATGCATTTAGCTTCAGGGTGACTCTCGCAGGTTGCCTTCAAACACAGATCATCAGGACAGGATTCTGGGACACTCACAGCGATTGGGCA	MMQQGFFGFDQLSTTTRYHNLCFTSLCIWATL	FW_1476_T7	GGATCCTAATACGACTCACTATAGGCCATATGCACAAGGAGGTGA	RV_1476	GTCCCAGAATCCTGTCCTGA	218
Arub-10	GHKZ01073336	comp1654_c0_seq1	adhesive epidermis	Suppl. Fig. 4k	TTGAAAGCTTCCCTTAAAATATTACTCTCCTGAGATGAAACTTATTTTTTTGTGGCATTGTTTTACACATTTCTCATAAACTACAGCATCTCAGAAATATTTTAAAGTAAGGTTTCAACTGTCATTCTCTTTAAACCGTGTAGGTTTAAAATAGATCTGAGGACATTGTGCTTTGTGTCCTACAAAAAATACCCATTAAACACTAAGCTTACGAGCTAAAGTAATCAATCCCAATGAGTTTAGTTTTTTTTTTGCCTGCAGACTAGTTGGTTTTGATATTCCAGATGTTGAGCTTTCTTTCTAATAGTCGTTGCACTTGAAGGTTACATCAAGGTACTTGTGAGTTCCGCTGCATGGATCATTTCTGAAGAAACGTCGTCCATTCACGTGAATTATACA…	MKITVKYNEHGEKYFTLTPFDGTSNTKTDGTEFLMKIDLNKILRDDSLQYTFRRLLENYNRGTTYYNNNDGVNTPFQFPVGNGLESFFSTLFQMIIETDSSGKMVTTPTNPSSNFQVILNGGNKAIVDYLMTFGSNTMDQNLRTELINHRLFISTSFYNTLTQKTEEIKIPFYVNFDGLDGSLSTLFKSTSRPLTQFGMKYQVVGPGGAKQIFTMPFTLIEYQGRKRQFLTLPTCTAFKMYGFVSDKEYLIDPDGINNGEEPFVVNCNMEKGETVVNHDRAESMVASYQAGKNTVDVNINYEGATKKQLLALRSVSDMCSQEMTHECVQKSTHFVNGKAHIWWESLDGVKRENWGTKTEEKMCHCGVNNACSDANSLCNCDSRGGVSDWGTLTDKDTLP…	1654_ISH_Fa	TCACCCATCAATAATGAAGTGACC	1654_ISH_Ra	GGATCCTAATACGACTCACTATAGGTGCAAGTACATCCCTCATAACACC	805
Arub-11	GHKZ01040734	comp3966_c0_seq1	adhesive epidermis	Suppl. Fig. 4l	TAGTGCTCAAACCTGTGTGGGGAGTTGCTGCACAAGCTGACAAGATGTTAAGAACGCTGATATTGGTGACGTTGCTGGGATATGTCGTTCCGGCGGCTGTTATGCAGAGATGTGAGGAATGTGCACCTCCTCCGCCGCCTCCCAAACGTTGTCACTGGGCAAAAAGTACGCCGAGCGAATGCTGCCCTTCAAAACTGGTGTGTGAAGAACCTCTGACTGCCTGTCGTTCAGGAGCAAAAGTGGCTAAATATTGTCCAGATTCACTCTGTGATGACACAACCTGTAAGGGTCACCCTCATGCGAAGTGTCTGATCAGTAGATGTGGAGGCTGTTCTGTCAAGTTCTATAAGCACGATGAACTTGTAAAATGTGCAGGACATAATAAAGAAATCAAACCAA…	VLKPVWGVAAQADKMLRTLILVTLLGYVVPAAVMQRCEECAPPPPPPKRCHWAKSTPSECCPSKLVCEEPLTACRSGAKVAKYCPDSLCDDTTCKGHPHAKCLISRCGGCSVKFYKHDELVKCAGHNKEIKPICPYLPVATCENSPCMYGKCKAEPSAPCRVDFCQPCTAVFHDENNKEMQCSPSVDTEPLPDFELDGETEPLQKDSKPHGETEPAQEEFGQQHSKPTQGEAISHEESEPAQEEPDQE	FW_3966	GCCCTTCAAAACTGGTGTGT	RV_3966_T7	GGATCCTAATACGACTCACTATAGGCTTCCCCTTGTGTCGGTTTA	513
Arub-12	GHKZ01028140	comp15624_c0_seq2	adhesive epidermis+ISH sections	Fig. 3c,d	TTTTTTTTTTTTAGAAAAATTAATAATGACTTGTTATTTTATTTTATTCCAAACAGAGATTTCAACTACCACTCCAGTGACCACAACGACTAAAGTTGTAACCACCACGTCTCAGTCTCCAACTTCTACAACTGCAGGTTACTGTATGGAGCAGCTTGACGGAACGCAGGGACTGGAAGCCAAGCGATCAGTACAACCGGCTATTGCCAACGATCAGTCAACTAGTGTCAACGCACAGCAACCTTGGACGTTCTCCCTTGATAACCAGCCATCTTTGAAAGATCGAGAAACTGTCAAAAACCCCAGTGTAACCATAGATTTCAAGACGGAAGTCACAGTTACTGGAGTAAGGCTTCAGGGCAGTACAAACAACGACAACATTGAATTCATCTTGTTAGC…	FFFLEKLIMTCYFILFQTEISTTTPVTTTTKVVTTTSQSPTSTTAGYCMEQLDGTQGLEAKRSVQPAIANDQSTSVNAQQPWTFSLDNQPSLKDRETVKNPSVTIDFKTEVTVTGVRLQGSTNNDNIEFILLAKRRLGETFVIVQGASGKALVQNMELKEQASDVTLIKPLKGLIGLRLEVVSLSRMDESQSTDSKLQFSLRAAILGCEEELSTTTLATTTTEAPLVSGFNPVITTIRQSSRSTTPTTVVTTTTEMPTSTTAGYCMEPMSGEQDLEAERSFTPQQIPNQSTNINAEYPWTFELSAVTTPQLTVYFTSKVEVRGFKLQGSGELVKELKFIVLAKFEDNGDFVEVPQDQKITATLSGDGLESVNLDTPLERVVAVRLQVQSIDDLKAGKGS…	FW_15624_seq2	AAGGCTTCAGGGCAGTACAA	RV_15624_seq2_T7	GGATCCTAATACGACTCACTATAGGGAGTCGCAAACTGCCTTTTC	859
Arub-13	GHKZ01072973	comp362_c0_seq1	adhesive epidermis	Suppl. Fig. 4m	TTTTTTTTACCCATATACCAAGAATAGTTTATTCGAACAATATAGCTGACAATACTTTTTAAAAAAAATTATTTTAAGGCATTGCACTAATTGTGTATTGGACTTTTGAGTTATCATGGACAACTTGAGCTGATAACAACTTTCCTTTGTCGCAGTTGTATGACAAAATCAATGTATCAAGTTGTTGAATTTTTTCCCTCAAATTCGTTTTTTAGTTACTTCTTTTGAACCATCATTCTGAGTTTTATTCTGAGTTTTATTAACATTAATAAGTCTGTATGGCCCCTTGTATTTAACGTATGTCTAAGATATGTCATTACTCATTTTTTTAAGATATGTCGATTACTAACAAATGTGATTAACACTAAAATTTGAATTGTAATGGTCAAATGGTTTGCA…	MLCHRGTTMGLSKSGTRAWIVVVCVIYVLPYATGQNLKIQPVVDEPLIMPAPMPPAPVPPVDIDNEEAEEKIALEKQAEIRNRAFGAGYLAIAPKVMCAGGHEKVFLTFTNFTQPVDVQFAVLDKNDESVGTSKLETFSTPCGCLDVHLNPSDSPRKTVTLVMYAKRTLMQCEEFEIVKKIKVYLDACYTETFIETDKPMYKAGQNVHFRVLTLHPDLRPDISEVDKIWIEAPGGVHMAQWLGVETNQGLIDETMKLSTNPTQGEWTIKVLHHNRDFSQKFTVGEYVLPKYEVMVQGPDYVVVDVEQISVVVCGRYTHGQPVVGSIILKVGVLNYPDKSVETSAEAKAGCFTFEVDMTKLDLMSSSYNVWNAKLHLEATFEEASTNHIMLKTSDSTKIV…	FW_362_T7	GGATCCTAATACGACTCACTATAGGACTTCGTGATGGTGTGTGGA	RV_362_T7	AAGACGACGAGACGCAAGAT	739
Arub-14	GHKZ01036917	comp2480_c0_seq2	adhesive epidermis	Suppl. Fig. 4n	CCAAGTCGCATGTCGCTTCGTTTCCGGATTCGTCAGTAGCTGTACACTTCACCGTGGAAGTACCAAGGGGGAATTCACTGTTAGAAGAGGGAACACAGACAACGTTTGGCTTTCCGCGCGAATTATCTTTGGCCCGTGGAAAACTAAAAGGTACTTGCATCGTCTGTGAATCTACTGATGTCACATAGTTGTCTTCCATGTCAACACTGCAATCGATGGTT	MEDNYVTSVDSQTMQVPFSFPRAKDNSRGKPNVVCVPSSNSEFPLGTSTVKCTATDESGNEATCDL	FW_2480_T7	GGATCCTAATACGACTCACTATAGGCCGGATTCGTCAGTAGCTGT	RV_2480	ACCATCGATTGCAGTGTTGA	197
Arub-15	GHKZ01066201	comp7100_c0_seq1	adhesive epidermis	Suppl. Fig. 4o	AGCTGTTGGAAGGTGAACATCAATTTCACATCGGTGGTTTTTAGTACGAACACATCCTAAGCCAGTGAGACGGATAACATCAATTTTACGTCTGGAGGTTTTAGACTGCACCAAAGGGGCAGAGGCAAGCAGTAAAGATGGCCAGAACATTTGTGTGTGCCATCGTGGTTGCCATCTTTGTGACCATACCCGCCGTTGCGTCTCAACTGTGTCAATTGTATCAAACGGAGAGGAACATCGGAGTTCAGTGGCTCCCCGAGACTCTTCCAGCAGAGCGATTCGAGATTACTTTCAGGGTGTTGGCGCTAGGGGATGTTTACATCTACCTTGGTGATGGTCCTCACGCACGTTTGGCTATTGGAATCGGTGTGGATCAAAACTCCGCGACTATCATCAAAG…	MAPKGQRQAVKMARTFVCAIVVAIFVTIPAVASQLCQLYQTERNIGVQWLPETLPAERFEITFRVLALGDVYIYLGDGPHARLAIGIGVDQNSATIIKGNSGKTYAKTPGIIKCDTFSEFWLLYSPSFVKLGRVGQTSPIVTLFHSESYVPTRLGFSTSSVSVGLFSFDPFGKTAPTFFEQEFNTCTGFCYDWRLNPMPLGERICFQARTEGVAAIALSPMREPNAGQSLYEIVFGYDENSMIVLRRHMHGEEIEVVEAKDTLNCDEFVSYCIEASGPHIQITRLGDPKILMDFTDSVGIPINYRYIGFAGGFDHCVEWRWPVDIIPKLILETGTQLTEETGEAPAVDPVLPDAGETSIVVPDLPAAETDVQPPLDESNNPSGSQGCAPVRCKKFCPFG…	FW_7100	TTGCCATCTTTGTGACCATACC	RV_7100_T7	GGATCCTAATACGACTCACTATAGGCCATCAGTATCTTGGGGTCTCC	813
Arub-16	GHKZ01076468	comp33_c8_seq19	adhesive epidermis	Suppl. Fig. 4p	GTTGATCCACTGCTTCTTCCACTGCTACCTTCACCCCTTCGTCTCTGCCTGAGCCTTTGACTGCTGGTCTTAACATATGTATCTGACCTCGTTCGCCTGTCACTGCTTTGTCCAGTCGATTTGGTTCTTGTATATGTCTCTCTAACTCTTGTGCATTTGGACTTCCTACCCTGCGTAACATACTCCAGGAACACTCGTTGTTCACCTTCCAGTTTGATTTGTACACCTCCAGTTATCAAGA	MEVYKSNWKVNNECSWSMLRRVGSPNAQELERHIQEPNRLDKAVTGERGQIHMLRPAVKGSGRDEGVKVAVEEAVDQ	FW_33_T7_seq19	GGATCCTAATACGACTCACTATAGGACCTTCACCCCTTCGTCTCT	RV_33_seq19	TACGCAGGGTAGGAAGTCCA	151
Arub-17	GHKZ01076234	comp204_c0_seq1	adhesive epidermis+ISH sections	Suppl. Fig. 4q,r	GCGGGCGTGACGGAGCATTAAGAAGAAGGGAGCCGCTAGAAGTAACGACAATGAAGACCTTGCTGATCACCCTGTTGCTGGTTGGGTTCACCCTCGCATTTGTCAAAAATCGTGGGATGCGGGATGACTTCAACAGCAAAGCGGTGGAATTCCTGAGCGGGCGTGACGGAGAGGCTGCCCGGGCAGAGATGACGCCCTCCCCAGGGTGTGTAGAGGGTGACATGGAGCTCACATCGGAACAGAAAGATGTCTACTTCGCCATGAGGGAAGCCACAGCTAAGAACAGAGCTCGGGTACGGCGTGACGCCCAAGCCGCATTCTCTATCTGGCCGAACAAGACCCTCGTGTATCGGTTCGACGCATCACTTGACAACGGCATCAAGCAAGTATTTAGGGAGG…	MKTLLITLLLVGFTLAFVKNRGMRDDFNSKAVEFLSGRDGEAARAEMTPSPGCVEGDMELTSEQKDVYFAMREATAKNRARVRRDAQAAFSIWPNKTLVYRFDASLDNGIKQVFREAIEIYREHTGLSFEEAFDDYSGAIHPLVVYGLNDGCSSSVGYRERSGGRMHLETEKCGALGTILHELGHALGRFHEQTRSDRDDYITVIESNILPGFEHNFRKADRPILALYDLQSIMHYSRDAFSFDRRSSTIMPHNAKDSEKMGTQRRLSRLDVFTVNAAYGVDALCPADLWDKCQRGGVPNKHCSCDCLPEFEGPYCEIVVIQTECSGHYQLEESGLISSPGYPNTYSSNAKCSYVIECAKDEVVQLDFLEFSLEGWGCFFDKMNMMTGDLVTEEYPDEY…	204_ISH_Fa	TGACTACAGTGGCGCTATACATCC	204_ISH_R	GGATCCTAATACGACTCACTATAGGGTTATCGTCGCAATATTCATCTGG	808
Arub-18	GHKZ01028139	comp15624_c0_seq1	adhesive epidermis	Suppl. Fig. 4s	CAACAACATCATCACCAACAGCAACAACACTTATGCATTTATTCTCCACTTCCAAACAGATAACAGCAAAAGCTTTTCTGTCCATCTTTGTGTAAAAAACCTATTATGCAAGTGAGGGGAATGAAACTCATACTCACAAATTTAAAGAACACTCGCACAATAAAAACAAAATATGCAGCCAGCATTTAGTACCAATATACAACTAAACTATTGATATAAGAATCCATGTTTAATTTGTTTTGCAGTTATTACTACTACGACCCAAACGTCAACCTCTACTACAGCAGGAGAATGTATGGAACCATTAAATGGCCTGCTGGATCTAGAAGAAAGACGTTTCATATCACCACAGCAAAATCAATCAACCGGTATTAATGCTGACAATCCCTGGATATTCGA…	MLTFIFVFNVLCMSNSVFKISDRMTCELSSSKAKENISKLQNIIFLHNLISIYILLFAVVTTTTQTSTSTTAGYCMDPLSELDNLEQRSFAPQQTLENQSTLINSENPWTFQLSSDAGEEYDNPWVIVQYQSKVEVRGFKLQGSGEDVITLEFILSAKSEDNEQFVDVLEGEKLGATLYQDNLKSITLDSPLPGVVAVKLQVIKKQNGGTGSLRIEVLGCEK	FW_15624_seq1_2	CCATTAAATGGCCTGCTGGAT	RV_15624_seq1_T7_2	GGATCCTAATACGACTCACTATAGGCGAATGAACGCTGTTCAAGA	754
Arub-19	GHKZ01073042	comp19_c0_seq1	adhesive epidermis	Suppl. Fig. 4t	TGGCAATGCACTACACATCTGACCATGACAGGACCCTTACGTAAGACCCACCCCTTATTCAAGATTATTAATGGATCTTTAATTGACCTTCCCAGACCAAGAAAACTTTCGATTTGATGAAAATTTGGCTCTTTATTAGGGCTATGCTTAATTGTTCAGATAATCACCGGACTATTTTTGGCAATGCACTACACATCTGACATTTCATTAGCTTTTTCGTCTGTGAAACACATATGCCGAGACGTAAAATACGGATGGCTTCTACGAAAAACCCATGCCAACGCCGCATCATTTTTTTTTATGTGCCTATATTTTCACATAGGCCGAGGAATATACTACGGGTCTTACGTTAAAAAGGAGACATGAAATGTAGGAGTTATACTTCTTCTCCTTACTATG…	MISSFVLTPCLILVLISVLSCTVACFRLLVLSGFFSRTVSPAGKMLSFFPEPDPLPRPWRPPPDFDPLLLPLPLPLPLLRSLTVGRGRDPEVFFGTNVSPADKILSFFPEPDPLPRPWRPPPDFDPLLLPLPLPLPLLRSLTVGRGRDPEVFFGTNVSPADKI	FW2_19_T7	GGATCCTAATACGACTCACTATAGGCACCGGTTACACTGCTGCTA	RV2_19	TCATCCTGCAGTCTGAGTGG	860
Arub-20	GHKZ01075375	comp199_c0_seq1	adhesive epidermis	Suppl. Fig. 4u	TACACAAAACCCAACCAAGTCTGCGAGTAAAGAGAACCGCCCCTCTTCCCCTGGCAGCAGCAGTCATACAGACCCTGATCACGTCAACTCACATGCATCAGGAAGTAAATCAGGGAGTGGTTCAGGGCGTGGCTCAGGCAGTAACGAAAGAAGAGGCTACTACAGAAGTCCGTGTGAGAAAAACCCTTGCAAACGGGGATCTTGCAAAGAGTTCGGCAAAACATTCAAGTGCAAATGTCCAAGTGGCTTCAAAGGAAGACGCTGCCAATATACAAAAAGACCACGCACAACTCATACCCATGGGAGCAAATCGAGCGGCTCGTCGTCTTCTGCAGAAATCGAAGCACCCCAACCATGTGATTACAACCCATGTTGGAACGGAGGAACCTGTTTGCCCGA…	TQNPTKSASKENRPSSPGSSSHTDPDHVNSHASGSKSGSGSGRGSGSNERRGYYRSPCEKNPCKRGSCKEFGKTFKCKCPSGFKGRRCQYTKRPRTTHTHGSKSSGSSSSAEIEAPQPCDYNPCWNGGTCLPEGDPYTCNCAPGYEGRRCEIAPTPHPCEQDPCSGHGKCYSTRDGGYRCECDPNYGGERCNEVIKVNPCDRNPCKNDGRCLTRGDDYQCHCMFPYEGTNCEQVQPGPCEDSPCTNGGTCFPDGQDFFCQCPKQFEGRRCEIALEVGPCQTEPCFNGGTCTPTATDFECACKPSYTGKRCEDSPDVNDHVILESTNGEMEDVDIPLLAFYTHSSYLLRFSVMCYDSVRIGFKSAVYSHVYYYVYLGKTSARIEHCENTCQSVSEVDISG…	FW_199	AACTGAGTGCGACAGCCTTT	RV_199_T7	GGATCCTAATACGACTCACTATAGGGGGCTGTCTTCGTCTGTAGC	709
Arub-21	GHKZ01092493	comp9623_c0_seq1	adhesive epidermis	Suppl. Fig. 4v	GTGTGCTGAAGAGTTTTCAACAACAGAATATGTGACAACCAAATCCCCTACAACTAAAGGTTTGCCAACTGGAGACACTTTTCTATCGTCTACTACCATCAACTCCCGTCACCCTCCAACAACGACCGCTACAACAACCAAGACCAGCAGCACTACAACTCATCAGCTATCAACAACTCAAGGTTACTGTTTGGAGAATATGGATGGTGAAGAAGGCCTTCAGGAAGGTTTTACACCTACCTCAGATCTAATTACTTTACAAGTAGAAAATGGAACAACTTACATCAAGTTCGAAAGCTTGCCTTTGGAGGTGGGAGACAACAACCTGCCCAGTGTTGATGGCATTTTAACAAGATCTGCCTCTATCAGAGCAATCAGTATTAGACTTGTTCCATCATC…	CAEEFSTTEYVTTKSPTTKGLPTGDTFLSSTTINSRHPPTTTATTTKTSSTTTHQLSTTQGYCLENMDGEEGLQEGFTPTSDLITLQVENGTTYIKFESLPLEVGDNNLPSVDGILTRSASIRAISIRLVPSSSSSTPSPTGNEELVSVTINFFTKKERNDDFKPLLLEDNQEPKVITFTPVSDQPLQKFLKIGNEVIEGVVAFRVTVLEVTGVSSATLELHVLGCAEEFTTTQVTTTAVSVTTPTTTTEE	FW_9623_seq1	AAAGGTTTGCCAACTGGAGA	RV_9623_seq1_T7	GGATCCTAATACGACTCACTATAGGTTCTTCGGTTGTCGTTGTTG	699
Arub-22	GHKZ01074320	comp141_c0_seq3	adhesive epidermis and stem+ISH sections	Fig. 3e,f	CCACCTCCGTTTTTCTTTCACAGCATTTCCTTCCCACTTCTCCAAGTTCTCAATTACTGAATATCACGGAAAATGAATACAAAAGCTGCTGTCTATCGACAATTCAAACTTCGGAATAAAATTGAAATTTTATCTAAAATAACTGAAAACTTGGAAGATTTGGTGACTGAAGAATAGTAGAATACAGAACATGTTAAAACTGTTACAAGTGCTGGAATGGTTAGACAGATAAATGCCTAAATAGTACTTAATAATTATTTGTAAAGTTATGGGTCTAATTTTATAGAGCTGCTTAACGGCTGTTAATATTTTTCCCCTAAACAGTCAATTTTGTGCTTACAAAACCACAGAATCGTAAACAAAATTGCTCAAGAAGTTAAACTGCAATCCTGCTGAAAG…	RPQHESVSIREAANRRRQSMRDFLPKTEEVVNEFQQVQKGLNTVKNDLKINASDARKSIQELVASKISELRKKEKSLLDEIDHTEKQRAQTMQQSDQKVTSFIGKARHSLEVARNAIETATDSDFLSLHPTVERDLQNLTEKSPPQVHQKLSFLKFTGLAKEAADNVTLGQVVKRGEWDMMATFGKEGTMEGEFKWARGITACPNGDIAVADRNNNRVAVSSSEGNHKVSIPAQSARNVACDSKNRLVVIDRSGLATVYNGDRKQVLQFPVAPSEQGTVDPRCVAIDKEDRIYIGDFTRQLISIHSPIDGKVERIIQVNMKPEFICVTGKNLILMSNADEGKVVAVDPWGAKGNEAFGFETVFEGEKMKPAGIAIDGNDEIYISGYMGYINTGQIHHYT…	FW_141_T7	GGATCCTAATACGACTCACTATAGGAACCCAGTTTCAAACGTTGC	RV_141	TTAGTTCGAGCGAAGGCAAT	720
Arub-23	GHKZ01006657	comp5429_c0_seq1	adhesive epidermis and stem+ISH sections	Suppl. Fig. 5a,b	GCTGGGGGCATGGTCCGAGTGGTTTGTTATAAAAGCTGCTCTTTGTTGCGAGTGTTTCACATTTACCAACCAGGTACATGTTGAGGAGAACATCCTGAAACGCAAGACCAAAGTTCATCAATTGGCTGACTTACAAGCGAGATACAAGCAGTGAGTCGTGTTTCTGACAGTTTCCCCAGGGTAACCTCAGCTGTCTCAAGAATGATGACATTGACGTGGTTTGTTGGGATCGTCTGTATCCTGATAGGTGGTATGCAAAGCACCGGAGAAGCTAACTCCCTAGTACACAATCGGGTCAGAAGACACGGGCATCATCACTTTCATAACAAGGACCCGTGGAGTGGCCTCGAAGGGTCCTTGAAGCACGTATCGGTCGGTCTGGCAGGAGTGTGGGGTGTC…	MTSEIQAVSRVSDSFPRVTSAVSRMMTLTWFVGIVCILIGGMQSTGEANSLVHNRVRRHGHHHFHNKDPWSGLEGSLKHVSVGLAGVWGVNCKDQIYYREDTYEDEVLGSDWVEIEGKLVQVDVGDDVVWGVNSCQNIYYREGIFGRNPTGNDWILVEGKLKHVSVSQRGHVWGVNKHDDIYHRIGASFWNPGGDSWNKICGKLKQISVGEAGVWGVNSAHNIYYRDGTFGDPESDPNGTGWTQVGGQLNYISSAENVYGVNCNGCVFKRVGRCSTNPVGTTWESHQGSLKQIESFSLMVWGTNKHNNVYEKDQE	5429_ISH_Fa	GTCTCAAGAATGATGACATTGACG	5429_ISH_Rb	GGATCCTAATACGACTCACTATAGGCCTACACGTTTGAACACACAACC	637
Arub-24	GHKZ01092421	comp9157_c0_seq1	adhesive epidermis and stem+ISH sections	Suppl. Fig. 5c,d	GCCTACTCCCCTTACTCCCCCACCTCCTACCCCAGCGACATCTCCTGTCAGTGGGCAGTCAAAGCCCCGGAGGGCACTCGACTCAGCGTCAACGTCAAGTTCTTCAATACGGAAGAGAACTACGATTTCATCAACCTCGGTCCCGGACTGAAAGAGCAGGATGAAGGTGGTTCTTATTACATATTCAAGCACAGTGGAATGAAGTTGCCCCCTGTGCCTGCCTTCAGGACCCCTGACAATGAGTTGTTCCTGACGTTCCAGACCGATATGTGGGTGACACACAAGGGGTTCGAGATTGAATTTGCTGATGTCGACGAGTTCGATCCTGGTGTAGATATTGACAACGTGTTGGAAGACAACGAGTACAACACAACCTGTGGAGAATCGATCAAAATCAAG…	AYSPYSPTSYPSDISCQWAVKAPEGTRLSVNVKFFNTEENYDFINLGPGLKEQDEGGSYYIFKHSGMKLPPVPAFRTPDNELFLTFQTDMWVTHKGFEIEFADVDEFDPGVDIDNVLEDNEYNTTCGESIKIKSDDEATITSPAYPLNYPNKFQCDWTFSIDAGERIGISFETLDLEPGADVLQIGKGGNPGTGMVAELSGNKRPTESMLVESSKMWMRLKTDASITRLGFKATVREQPYNDCGGNVQISRDGSAVVASPQFPDVGYHLNHNCLWKITGDTERGLTAIFKDFSTEKQWDTVSMGFGPEPARDGSNYVIENWSGNKLPTPDEFTTEENEMWIHFKTDGTVIDRGWKVQIFDSNIQSSNTTVEKKDIIKPDRDCGGTLRFDPSMGKAVLTS…	9157_ISH_Fc	CATTTAGGTGACACTATAGAAGGGAGAATCGATCAAAATCAAGAGC	9157_ISH_Rb	GGATCCTAATACGACTCACTATAGGGCGATATTTGTAAGGGAAATCTGG	843
Arub-25	GHKZ01072797	comp736_c1_seq1	adhesive epidermis and stem+ISH sections	Suppl. Fig. 5e,f	CAGTCAGAAGCCATACAACCGTTATTTGCCATGAAGCCAGGGATCAAACCACGTTTACGGTACAACCTGGGAAGCGGTAGCAAAGGGATCACCTTAAGGGGATATCACTTTTCTTTTCAGATATCAAACCAAAAGGGAAACTGACTGGTAATTAATTGTTTATATAGTTTGAACTCAGTAAGATTGTAAATATTAAAAATCCCTTTTAATTCCATACTGTAATTCGGGAAGTTATAACTATACTGAAAAATAATGTGACAGACACTTGTATAAATGATATGATGTGTCTAACACTCAGAGATACACAACTTGCTTATTATTGAACTAAGATTCCGTATCATACTTTAATCCATACACATTGCCATCAAAGCCAGTGCCATCATTTAATGGAACAGCACG…	MMARPADQQLLVFAITLFLCLSVEAFHYKGGSISWRIAGYNADQTEVDVVISHRVSWQDSSSDSVRCTQDRVDTKARFGGGVMTCQGSGTVECPETTLAGGRDFVCTDYNVGAVWSSGVNSITQRFPVPGTASDSYFVGYQGCCWADDITGGNYGLMTAINLSPRLDNGLLNSSPKTTMFPVVRIQRGCTENIRIPMLDADRDYVSCHFATNPDDIADSCHSLCDFRVPNIELNPDNAMGCILQVTASGSRSQYAVALVVQDRQLPSSNPLSSVPLQFVLEYYGTDNEQCAPRPTFVPDTPEYGIVVVAQPTEAGMSGSITIVVRSSADGESITDIVTLSPLNTRKTELTTINDREASIEVTFIQGAEQPGSHSMCFYGNQTNGISSEIRCITVAFDVT…	736_ISH_Fc	CATTTAGGTGACACTATAGAAGTGAAGTACAAGATGGAGAGCTTGG	736_ISH_Rb	GGATCCTAATACGACTCACTATAGGCAGAGATGTTCAGCCATTTCTACG	795
Arub-26	GHKZ01007840	comp4570_c0_seq1	adhesive epidermis and stem+ISH sections	Suppl. Fig. 5g,h	TTCATATGGATCTGTTAGTAGACTGACTGTATTGCAGAGGGAGCATTTCGCCAGGGGGATTGTGTGTTAAACGTCAACAGATTCGTTTAAATTGATGTATATTGACACAAGAAAGACAAACTTCTTAACCCTTGATTGACGGGGGGAAACTGCCTTTTCAGATCGGTGCCGTTGGGGTGCCATTGTGAGCTATCAAGATGTTTCAACTTCTCCTACTTATCATGGTCACTGTACCCGCGTCGTCATTGGTGCAAAGTGACGTTGCTGATATGACTTGCGGCGTTATAAGGGAGACGGGACACAGTGAGGAATTTATGTGGGATCTTCCCCAACTTCATAACGACCCAGTTGTAGTTGAATTTTCTGTCTACGCAAAGAGTGAAGTTTACCTTGCCTTAA…	MIKMFQLLLLIMVTVPASSLVQSDVADMTCGVIRETGHSEEFMWDLPQLHNDPVVVEFSVYAKSEVYLALTDKPGPNLPAKATVYYIVIGGDGNTASYISRCRGCQPLTPASTEVLQCDRLNNYWLHFEDGFIKLGLRGKLEPITTYEVPEKDFQPRYLGYSSNMLSQGMFTFSFDKFGYHTYSEHVYYTGEAFCLDWFLKEIPVGVKQFCFQAQVEQGPIYVVLSPQRFRNPGEIAYEIVIGEEENSKTFVFDKVRSGEQAIKEVFTPSVLNPNSFVEYCFTFNEKVITFGPASRRDLVVWVRDESIQIKHVGFAGSKKPAQFLFPVDFIPSYYQGVIDLPPESPAGSDKCLEKPCAENGKCYVDHSFSHGYRCECSNGYTGKNCDILPPETVPAVEE…	FW_4570	GACGGGACACAGTGAGGAAT	RV_4570_T7	GGATCCTAATACGACTCACTATAGGACTGGGCCGGTTTCTTACTT	866
Arub-27	GHKZ01077073	comp1172_c0_seq1	adhesive epidermis and stem+ISH sections	Suppl. Fig. 5i,j	TCAGCGATTACTTGTTTCCCCAGGCCGCCTTTTAAACCAATTAAAATATTGTTTTATTTCTTCAAAACTTCACTCCCAAAAGTCCCCAAATATCTTTGTATTTAGTGTTTCTTCACGGTAATGTACATGATAAAATTACTTTCTACAATACACAACGTATTCTTCCCATGCACCAAAATTAACGTTACGTACATTAAGTCAACACTCGGGAATTTATGCTACTTACACACTGAATTTATTTGATTTATTTGAATGATGCGAACTGTGAAGCTAGAACCGCACGTGTTTTTTATTCTTCTGTGTTTACTTTTCCCAGCATTCGGCACAACCTCCACCAAATATCTCCATCTTCAAGCCAATTTTATTGACCCATTCTACCGGAACAAAACGAATGTACCG…	MKFLFKQRHGREEGDPTMTLLLRALNLVPILLLAFGLPCIQSKALFDFAKAYGDVCGLPLSSEVKDGSITASSSMVGYQPEQVRFQKLNYVGWRPALSNRLQWLQVELPRTIYVTGILTQGNTQIDNYVTQYKIEYSLDLKHWACLMDMHGYPKIFTGNSDHTSTHLNKFRPAVLARYIRFVPVEWVNKIGLKMEIFGGGCAECWEK	FW2_1172_T7	GGATCCTAATACGACTCACTATAGGACTCCCAAAAGTCCCCAAAT	RV2_1172	TCGTTCCCATCCTACTCCTG	780
Arub-28	GHKZ01049018	comp12694_c0_seq1	adhesive epidermis and stem+ISH sections	Suppl. Fig. 5k,l	ACCTTCATTTTGCTCGCCACCTTCGGATTGCTCGCCACCTTCATTTTGTCCATTGCCCGTGAAGAAGTCTGTACTACCTACGCCTTGGTTTTGAGCTCCTTGGACGCAAGGCCAACGTGACACGACGTGTAGGTTTCGGTGCCGCCTGCTCTTGCAGCTCTTCTGCAAGACCATACACTCTGAAGCGTATTTCTTTCCATCGGAACCACACACTTGCACATGACGGGCATTTCTGCAGGTTCTTGGGCATGTTTGTCTGACGGTTTCAGGGTTTTGACCTTTTAGGTTTAGGTTAGCGGGGCATCGTCCGGTGTGTTTTACGGTGGCCGAAGTCTGACCCTCACATTTTTTGAGGGCCAGCTTGCATGCATTGATGTATGTGGTTCCGTCTGTACCACA…	MDCSISSKMKFLIGVLCVIAFASIAESAPRRSCKSNFRRCLNRLEEGEIHTGKVCGTDGTTYINACKLALKKCEGQTSATVKHTGRCPANLNLKGQNPETVRQTCPRTCRNARHVQVCGSDGKKYASECMVLQKSCKSRRHRNLHVVSRWPCVQGAQNQGVGSTDFFTGNGQNEGGEQSEGGEQNEG	FW_12694_T7	GGATCCTAATACGACTCACTATAGGCCTTGGTTTTGAGCTCCTTG	RV_12694	TCCACGCAGGACAAGACTTT	516
Arub-29	GHKZ01078518	comp104_c2_seq1	adhesive epidermis and stem+ISH sections	Suppl. Fig. 5m,n	TGCACAGCTATCATACCATTCAATACCATTCACTTGATTGGTTTCAAATGGTGTATCATCTTGTTAGAAAAAGGCACCAATTGCTTATAGGAGGGTTAAAACATGCATATCATGCAATCAAACTGAAAATTTGTCCAATTTCTTGGTCTTCAATCATCACTGATCTTGTATTATACAATTTATGCATTGTTACTTGATTTTTTATTTATTTTAGTAGCAACTAATCATGATTTGCAAAATGTGAGAATACCATGAGAGTTTTCAATTGGCTTTTACTTTAATTAAGCCCAGACTTCCTGCAATTTTGAATTAAAAAAAATAAAATTTTATGACACAAATCAGTAGAAAAACAACTGTCAACATTTGGGCTGTTCTCTACTCATGCAAAACATTCGCAGG…	MMADVDPAVVADLSAETKLPKDTVEEVVRHFQEFDLDGNGYITTEELGEALQSVDIVMPGYELRNLMKTLDKDNDKRINLSEFFGLYVGIKNKEVAKTFRKAISKREGISALSGTSHTSAEGTTHSVAEAEKVAFANYINHHYELNKDAEAMKYLPINEGTNEMFQKIDDGILLCKMINVSVPDTIDERAINRGKKLNIYTKQENLTLALNSARSIGCNIVNIGAGDLAHGTPHLVLGLLWQIIRVGLFAKIDLQQVPGLMRLLREGEDINTLMSLSPEELLIRWVNYHLEQAHSDRRIANFGEDIKDSEVYDILLKQVAPRDKVQEFMNVSSAAAPLKRAETVLNNADVIGCRAFVTPHDVVNGNQKMNLAFVANLFNKFPALDPPDEEIEEIEETRE…	FW_104_T7	GGATCCTAATACGACTCACTATAGGTGGAAGGATCCTGGAAACTG	RV_104	GCCAACTTTGGTGAGGACAT	760
Arub-30	GHKZ01026165	comp15560_c0_seq1	adhesive epidermis and stem+ISH sections	Suppl. Fig. 5o	CGGATTCATCCGAGGATCCACTATCCCCTGACTCATCCGAGCCCCCCCATCCACCAAGCTCTTTCCACAATGGTAAACTCGGAGCAGTCTTTTTCTTACCCCATCCTTTCCACCCTGGTTCACTCGATTCCTCCTCTGATGCTCCCCATCCAGGGAAGAGATACTTTATCCAACTAAATTGTTTGAATGGAAACCACGGTTTGGAAACACTGTCCACGGTGGCTGCCAGGAAAGCAGACGGTTGAATCTTTGTAACGCCCTCAACGTTATCACACATCAGCCTGGCCATGCTCGCCTTTTTTATTTCCGTTCTTTCAGCTAATGTAAATTGATGCGGGTTTGTGTAGAAGAAACGGTCCCCGAACTTGAGTCGCCTGAACTGGTTTGCAAAGATGGTAG…	MRTISTRCKMRLLGLALLVSLAVTAASLIQETDTVDKDIQLLGELEDLLNRDGNIKAYYEPEAGHVLHERTAESLLRQFNTAKRSPAALRRLKKLRQQLTARNSALAARKPNQEVKDLIGAIDDSLGKSALRTTCDVTTLKFRTIDGSCNNLGEPEQGSAETPLLRLVTNAYDDGLSKPRSRKAAGLGSLPNPRAISKQVIGGSTKQIKSFTSLGVHFGQLTDHDLTASESQEIECEECEMEGECFAIRIYKSDPVFGRVQKCFPFIRANHEEDPQGVRQQINEVTTWLDASFVYGSDELTAELLRDDFGLLRHLTDGVTGRDLLPPNKELTLCAGVDEDAGIFCGLAGDGRVAEQPGLTSLHTLFLREHNRIARQLRDLGDLSDEEIYQTARRIVGAE…	15560_ISH_Fa	TGGTGCGATAGATGATTCTCTAGG	15560_ISH_Ra	GGATCCTAATACGACTCACTATAGGGATTTCCTCATCACTGAGGTCTCC	808
Arub-31	GHKZ01071776	comp691_c0_seq1	adhesive epidermis and stem+ISH sections	Suppl. Fig. 5p	ACTTTTCTACATTTGCCCTACCTCCTGAAGCCTATTCCTACGATAACTCTGGAGACTCACCCACCATCACAATAGAATTTGATAATTCAGTGTTTAACGTCGGTGAAAGCGCTATGTTCAGTTTGGAAACGTCTACACATCAAGTGTTGTACATTGCTACGGATGCTGCCATGAACAATGCTACTTGTTGGACCAACTTCACTGTAATAGATGAAGAGGCTCCAAATATAACATGTCCTGAAAATATAGTCAATAATACCGACCCCACTTTGCCATATGGCACTGTCGTCTGGTCTGAACCTATTGTCACAGACAACTCTGGACAGGACGTTCTGTTCTTGGGAGATGTAAATTCAGGATCTACCTTCGACATTGGTTCGCATGTTGTGATCTATAACG…	FSTFALPPEAYSYDNSGDSPTITIEFDNSVFNVGESAMFSLETSTHQVLYIATDAAMNNATCWTNFTVIDEEAPNITCPENIVNNTDPTLPYGTVVWSEPIVTDNSGQDVLFLGDVNSGSTFDIGSHVVIYNATDSSNNINYCNFTIQIKDLEPPEFTECVNISIPTVSNEAFAFVEVFDLNATDNSDGNVTLLCPGSPQGLTRFSLGDTYIPCFATDIYGNSATCHRTVTVQDKQDPTIICPESMDFFTDESKNYATVTLSPPFNASDNTQNYTVYIVIDQLTHYINDSIRLSLSEFAHTLQYVVEDASQNNATCDIFYNISDNEVPNITCPEFVWNTTLDNLPDGQAFWQLPVVSDNSLVPIIPVSSDNPGSVFPIGVHTILYDTADLSGNSNNCSF…	FW_691	TTCGCAATGGCTACAGTCAG	RV_691_T7	GGATCCTAATACGACTCACTATAGGTTCGCAATGGCTACAGTCAG	740
Arub-32	GHKZ01065341	comp7802_c0_seq2	adhesive epidermis and stem+ISH sections	Suppl. Fig. 5q	TAAGTATGCTGAGGGAGAGAAATGGAAAGATGGATGCGCACAGTGTGAGTGTTTGACTGGTTTCAGTCATATTTGCAAATCCACATCGTGTCCAATCTATGAAGTACTTGAGGGTTCAGTATGTAAAGTACGACCAGGAACTGAAGAAGATTGTTGCCCACAATATGATTGCGAAGAGGCTCCATCTAACAAACCATGTATTGATGCCAATGGAAACACGCGTAAGCATAGAGAGGAATATTTTTTGGGAAAATGTGATCCTTGCGTCTGCATTGATGGTATCCCTGTGTGTGCAGTTGTAGATTGCGTCCATCACCCTCCAGTCTCGCCCTTTGAAATCTGCCATGTGAGGCCTCGAACAGAGGACCAATGCTGTCCAGAGTATGATTGCA	KYAEGEKWKDGCAQCECLTGFSHICKSTSCPIYEVLEGSVCKVRPGTEEDCCPQYDCEEAPSNKPCIDANGNTRKHREEYFLGKCDPCVCIDGIPVCAVVDCVHHPPVSPFEICHVRPRTEDQCCPEYDC	FW_7802	TTGCGAAGAGGCTCCATCTA	RV_7802_T7	GGATCCTAATACGACTCACTATAGGTGGTTGCTCAATACCTGCAA	364
Arub-33	GHKZ01077444	comp97_c0_seq1	adhesive epidermis and stem+ISH sections	Suppl. Fig. 5r	GCATGCGTAGAGACCCTGTTGGAGTGGCAAACAACATAGAGTTCTGCACTAAGTAGACAGGCAATCGCGTGTGCGTCACGCACCCATTAGCTGTGTACAAAACAGCGCGATTTTCCCTCATTTTGCCAACCAAAGCGTTAGTGCGCACACGCTATGTGCAATTTACATATTTCATGGGAAGGGTCTATTGTACCATGTATTTAATGCACACATCAGTGGTTGCCTGCAGTGTATTATTACCACAACATTGTGCAAAGGCTCCTGTGGTACAAGCACACCTAAGGTATCATTTTTATTTCAAAGTGTTTGCAACATTACGTTATCACTGAGATGTTTTTATAAGCGAGGACTGCTCAGCAGACAGGATTGAGCCACCAGTCTGAATACATATTGACTGGT…	MSKMPRRGPTYKELRRKFNANNLYEDPEFPAVEKSLFFSQSPGKRFEWKRPHELCENPQLFVGGASRFDIAQGELGDCWFLAALASLSLDDYLLKRVCPEDQGFDRNNYCGAFYFQFWQYGKWVEVIIDDRLPTYNGRLVFVHSESNNEFWSALLEKAYAKLHGSYEALKGGNVVEAMEDFTGGFSETHDLKKAPRNLFKILFGAYNSDSQMGCSIDQAGRGTEAKLDNGLIVGHAYTITDVKRVSLPSYPKPVRLIRIRNPWGQVEWNGRWSDKSYEWKSVSDRQRKELGLETKDDGEFWMEYTDFLREYSRVDICHLSPDKAPGGKKKKSKWVVSEIEGRWQKNMSAGGCRNFPDTFWINPQIEMMLEEEDDEEDDDDEDDDGSPAAKQKGATVMIG…	FW2_691	CCAGGTTGGGATTGGTATTG	RV2_691_T7	GGATCCTAATACGACTCACTATAGGGTTACCAATACGGGCGCTAA	766
Only proteins present in the four footprint samples and not all mucus samples were considered.

## Sheet: 2.2 Primers_RACE_PCR
Table S2.2: RACE primers.
Transcript name	Primer name	Primer sequence	annealing temperature
Arub-1	199_3a	AACCCAACCAAATCTGCAAG	56
	199_3b	ACAACGGGCATTTTTGAGAG	56
	199_3c	TCAAGACCCATGTGCGAATA	56
	199_5a	CTGGCACTTCATTGCTTTCA	56
	199_5b	CACGTTATCCGTCACAATGC	58
	199_5c	GTTGACATGGTCAGGGTCTTT	48
Arub-2	1698_3a	CTGAGACCACGCCTGAAACT	60
	1698_3b	TGGACCAAGACTTCACTACCC	47
	1698_3c	TCAAACCAGATGGAGGAGCTA	48
	1698_3d	AGACGGGAGCAACGTATGTG	60
	1698_3e	TCTTATCCGCTGGAGAAACG	58
	1698_5a	GAAGTTTCAGGCGTGGTCTC	58
	1698_5b	TTCAATTCCTTGCCATCCTC	56
	1698_5c	TCCCTTCCAGGAGGTGAGTA	60
	1698_5d	CGATAAGGGTAGTGAAGTCTTGG	48
	1698_5e	TTTCCGGATTCGTCAGTAGC	58
	1698_5f	TACCAAGGGGGAATTCACTG	58
	1698_5g	GAAAGCTGACTCGGTAATTTCAA	48
Arub-3	6449_3a	AGATGGCATGCCCAGTAGAC	60
	6449_3b	ACATTGGGTATAGGCGCAAA	56
	6449_3c	GATGAAGAACCGCCACAGAT	58
Arub-4	73893_3a	CGCTAAAGCCAACATCAACA	56
	73892_3b	TCAGCCTTCACTGTGGTGAC	60
	73892_3c	TTGCCACGAGGAGTGTGTAG	60
	73892_5a	CGCAAGGTCGT AGGTTCTTC	60
	73892_5b	GTCACCACAGTGAAGGCTGA	60
	73892_5c	GTCAATCCCAAGATCGGCTA	58
	73892_5d	CCTTCAGCTTCATCTCAAACG	48
	73892_5f	CTGTGAAATATCACCTGTTGACAC	48

## Sheet: 2.3 Asterina gibbosa 
Table S2.3: Expression pattern, DNA and protein sequences and primers of A. gibbosa.
transcript name in Asterias rubens	transcript ID Asterina gibbosa	in situ pattern tube feet whole mount	Figure	DNA sequence	translated protein sequence	in situ FW primer name	in situ FW primer seq	in situ RV primer name	in situ RV primer seq	length in situ probe
Sfp1	Agib-Sfp1	adhesive epidermis	Suppl. Fig. 5a	CGGCGCCAGATATGCCTTAATGTACTACACGAATAAGTAACAAAATAACCAGAAGTCTTATGGTATTATGGGATCACCTTAGTCAAAGTCATGCACTTTCGTTCGAGCAATAGGTTTTCTCCTGTCAAAAATACTGATACACTTCTCAAATGCTTTTACAAGAGGCATGCTGAATGCTTCGATCCGTGCGCAGATATGCTACGCAAAACGCTTAATTGTGCATTTGATAAAGTTCTTAATTGGGCTTTTAACCTTTGCTACCGAAGATAGCGCCATCTGTTGGTTCCCAGGCGTTCGTCGGTGCAAAACCTTTCCAAGGAAAAGAAAAAAAGCCTCGCACGAACAATTAAACGATACGATACATTTCAGACAGAGTTAACGATTAATACATGTAGTAAC…	LVIGVVSQGHCGIADKDGSPMGCVKQFHVQYSSDGQTFEYVTDDHGEADIFESRCRCQKHIKNFFRSALMTRFIRVEPVLWKNAISMRVDFIGRDIEVDEPDVAGTDAPVDEAEVDMAVVLKGRPFKRCGFLKGIKYRPFNAESFTVAVVRQIKDSEDTFELIGSTYVTTSGKDRLQRFEVAEENDRIPVKKGDYLCLIFPKAVIGYSASDDPKDVVLTASLGFDEYKAITMNGQINFPNKDGRKYSGVRPIFQVATTKTIPPVMSTGSLGVEEGQVKDEQITASSFCDAHSKAERARLGLKDQQGMTGGWCGRELDQSAFIQVDFKKVRRCGGVVTQGLSSATRFWFVRLYIVQCSLDLTAWEDILDDDGNIMMFDGNSDQDTEKPNFFAEVKNCRAL…	FW_Sfp1_AG_T7	CATTTAGGTGACACTATAGAAGTACAGGACAGAGCGAGTGAAGG	RV_Sfp1_AG_Sp6	GGATCCTAATACGACTCACTATAGGGGTCAAAGATGAGCAGATCACG	792
Arub-13	Agib-13	adhesive epidermis	Suppl. Fig. 5b	GGGGTTTCGCTGAGCCTCAGAGCAAGAGGTGTGGGGATGGGGGTTGGGGTGGTGGTGGACCCATGCCGGTGTTTGGCGGCATGCGAGGGATGCCTAGTCCAAGTCCCAACCTCAAGGATGCCTCGCAGTCTTTCAAGGATCTGGGTGTAGTGTACTTGACAAATCTTCAAGTTGAAACAGCACCTTGCCCAAAAGTGCATCCCTGGCTTTATCGTAGACCTGAAGTGATGGAAGATGGAATGGTGGTTCCCTTGGCAATGCCCATGTTAGAGATGGCGGAGGGACCACCCATGGTTGCTGAGGCTGAAGTGGCAGTGAGTGCTGTGGAGGGGGGCGGGGCACCAGACGTCCGTTCCTACTTCCCAGAAACCTGGTTGTACGACCTGATACGAGTCAACT…	GFAEPQSKRCGDGGWGGGGPMPVFGGMRGMPSPSPNLKDASQSFKDLGVVYLTNLQVETAPCPKVHPWLYRRPEVMEDGMVVPLAMPMLEMAEGPPMVAEAEVAVSAVEGGGAPDVRSYFPETWLYDLIRVNSDGSANIPIQVPHTITEWIGHGFCTSTRFGAGVSELTRLTAFQPFFVDMTLPYSVIRNEYVPVTVVVFNYVTKCLVVKLTLQPSDDFEVEEQNRREHICVCGGQSVPSSFYIKASTIGSIPIEVHAVSVEDSDSWCHGQDMDTSQNGFSDAIRKPLLIKPEGVETEQVFSAYFCPDDYEGGKYEEVISLQDLPDNYVNGSERGIVTVTGDMLGPTIDNLDHLLRIPTGCGEQNMIGFVPNIYILHYLKGINKLNPDIEAKAKENMEI…	FW_362_Sp6	CATTTAGGTGACACTATAGAAGGGCTCCATTCCAATAGAAGTGC	RV_362_T7	GGATCCTAATACGACTCACTATAGGAATGTCGTCACATCGTTTACGC	719
Arub-15	Agib-15	adhesive epidermis	Suppl. Fig. 5c	CAATAGAAGACGCAAAGGACACTCTACCAAACCCGCGTTTTCAATTCAACTTCAGAGTGATTGCGCTTGCTGATGTGCGCATTGTGCTGGCGGAGAGCCCACTTCCTAGCGCAAAAAGAATCATTATCGGACTTGGAACGGCCAGGAACAGCAAGTCTTACATTTTGCGTCCTTCCGGTCGCCAGGGTGAGACCAGAAACACTCCGAATGAATTGAAATGTGACCGATTCAATGAGTACTGGTTGCAGTTCGAGCCAAGATCGTTGAAGGTTGGAAGGGTTGGGGAAAGGTTTCCCTTCATTGAGTTCGACATTGATCCCAACAACCCGATTGTCCCTAAGCACGTGGGCTTCGGTACCAGCCCCGCCAGCGTGGGGGTCTTTAGCTTCAGTGATTTCA…	IEDAKDTLPNPRFQFNFRVIALADVRIVLAESPLPSAKRIIIGLGTARNSKSYILRPSGRQGETRNTPNELKCDRFNEYWLQFEPRSLKVGRVGERFPFIEFDIDPNNPIVPKHVGFGTSPASVGVFSFSDFKEHSPIFHEHVFMTDKGYCYDWTLRPWPISAKVCFQVKTEGIAALALSPEKDPSAGELVYEIELGFSNNQLTVLRRGMHGANIAVESTKDILDCDEFRTFCLEARGPRITLTALGDPKPILDFTDEERPEVIYRYIGFAGGYDFQVWWRWPVDMVPDYEVPKEPEIVPEPQDPCQPNNPCLNGGKCTNLGGGKYSCACINRYSGDNCEVKPDNPSGSDVKVSTAEPPPRPRDPCRPNNPCQNGGICSSSGISQYNCQCMNGYSGTDC…	FW_11575_Sp6	CATTTAGGTGACACTATAGAAGCGTTGAAGGTTGGAAGGGTTGG	RV_11575_T7	GGATCCTAATACGACTCACTATAGGGATACTTTGACGTCACTGCCGC	802
Arub-25	Agib-25	adhesive epidermis + stem	Suppl. Fig. 5d	CGACCTTCCCCGATCAAACCAACTTCTGTTCCAGTGTGGCACTCTATGCCGACCTGTGTCAGGAATCAGGATTCCAAGTTGACGGATGGAGGAGTCCGCAAGTGTGTCCAATGGAATGCCCTGAGCATTCGCACTACAGTGCTTGCTCGTCACCCTGCCCTGCTGCTTGTGGACTGTCTGCTGATATCTGCCAGCAATCAGGGCCCTGTATAGAGGCATGTGAATGCGATGAAGGTTACGTACTCCAAGGAGATGATTGTGTCCGGCCAGAACAATGTGGCTGTCTTGTTGGATCTTTTTACTACGAGATTGGAGAAACCTTTCCCAATTCAAGTTGTTCAGAATGGTGTACCTGTGTTGACCAAGAAGCTGAATGTGAGAACCGTCAATGCCACAGTG…	TFPDQTNFCSSVALYADLCQESGFQVDGWRSPQVCPMECPEHSHYSACSSPCPAACGLSADICQQSGPCIEACECDEGYVLQGDDCVRPEQCGCLVGSFYYEIGETFPNSSCSEWCTCVDQEAECENRQCHSDATCAFRGLLLGCYCNEGYLGDGYSCQQDPCQTGEEHCSGNGRCVSNGEGGFDCECRRGWSGEICDMGMAICSGHGDPHYTSFDGRRFDFQGDCRYTLLRVFVESLNDTVEVVADNERYSMNSRVSLTRELLVIVGDSRIELLQDKKVEVNGLEVNTPYTVLPGVSIRRAGKQLVVETPFGLKAEWDGRNTFSIEVSAEYFNRTEGLCGPYDDERDNDFRTPGGEVVPDENSFGNSWVYGDCGTMEPPGDSYNPCNDNPMFDQAHEH…	FW_736	GAGACATACCCTGCATCTCACG	RV_736_T7	GGATCCTAATACGACTCACTATAGGGTCGTCGGTCACAAAATACAGC	776
actin	Agib-actin	overall	Suppl. Fig. 5e	CGGGATTCTGTCCTTTGGTGCCACCACGAAGAGACGTGCTCCGGGAACCCATTCTTGCTTTTCTTGTGTGTGTGAAGCAAACAAAACTCAAACAAAATGTGTGACGACGATGTTGCCGCTCTGGTTGTAGACAATGGCTCCGGTATGTGCAAGGCCGGATTCGCCGGAGATGACGCCCCAAGGGCCGTCTTCCCTTCCATCGTTGGAAGACCACGCCACCAGGGTGTCATGGTTGGCATGGGACAGAAGGACAGCTACGTCGGAGATGAAGCCCAGAGCAAGAGAGGTATCCTGACCCTGAAGTACCCCATCGAGCACGGTATCGTCACTAACTGGGACGATATGGAGAAGATCTGGCATCACACCTTCTACAACGAGCTGCGTGTGGCCCCAGAGGAG…	MCDDDVAALVVDNGSGMCKAGFAGDDAPRAVFPSIVGRPRHQGVMVGMGQKDSYVGDEAQSKRGILTLKYPIEHGIVTNWDDMEKIWHHTFYNELRVAPEEHPVLLTEAPLNPKANREKMTQIMFETFNTPAMYVAIQAVLSLYASGRTTGIVFDTGDGVSHTVPIYEGYALPHAILRLDLAGRDLTDYLMKILTERGYSFTTTAEREIVRDIKEKLCYVALDFEQEMQTAASSSSLEKSYELPDGQVITIGNERFRCPEALFQPSFLGMECAGIHETTYNSIMKCDVDIRKDLYANTVLSGGSTMFPGIADRMQKEITALAPPTMKIKIIAPPERKYSVWIGGSILASLSTFQQMWISKQEYDESGPSIVHRKCF	FW_actin_AG_Sp6	CATTTAGGTGACACTATAGAAGAATGTGTGACGACGATGTTGCC	RV_actin_AG_T7	GGATCCTAATACGACTCACTATAGGTGTATGTGGTCTCGTGGATGCC	842
Sfp1 sense (Asterias rubens)		weak stem	Suppl. Fig. 5f	TCACAAAAAAGCTGGGAACATTGAGATAAACTGCCTCAGCAAAGTAACTAACTACATTTTAGTGTCACAGACTTCAGGAGTGGACTTGGGAGTGCCACGTCGGGTTCTCTTCACACTGGCAGCTCACATCGTCGACTATAGATATTCCGGGGACGACCAAGACGACACAATCAGCACACCGGGGTGGCAAGAGGTTTACCCAACGACACGGAGAAACGAACTCTCCAGTGGACCAAACATGAAAGCGGCACTGCTTGTCGTTTTGTTGGTCGCCTGTTCGGCAAATCTAGTCACCAGTCATGACGCTACTCCGGCTTCATGTCAGGATGTACTAGCTCAAGGAAACACACACGATGGAATGTACGAAATCGACCCTGATGGTGCAGGAGGCGAACCACA…	MKAALLVVLLVACSANLVTSHDATPASCQDVLAQGNTHDGMYEIDPDGAGGEPQFQVYCELAGGKGVSIIHHDAECADREACKVDGFEEPGSFVKKVNYKGNIKQIEALIDLSGYCEQFLSYEAHASVIFWQPQNKNYAWWQNRNNRVMQNWGGAPTGTHGCGCSTEAEGCIEKKRCNADCNTHQLTIDSGYLNDKDNLPVTELHFGDTGTLTDNEYGFYKLGPIRCSGGPTHKEQEIPVFNTDTIYQYRYDLPRIKPGECRIVFEVQACNDAFIGFSEQEGEQAELIELNIGGWGNSKTVIRNCKQCQTESAIEESILSCDEPKKFFVSWCTGTFTFGREGHGSLLSWNPPRSIHPTHVAFSTGYGATGTFSFDSFFSKEIHTCQNQKADINCGSRFV…	Comp43_FW_3	CTGTCACTAACATGGGACTTCAGG	Comp43_RV_3	GGATCCTAATACGACTCACTATAGGGAAGTACAACCCCTTCACGTAACC	599
Only proteins present in the four footprint samples and not all mucus samples were considered.
